# Supplementary material for: One-step synthesis of flower-like Bi2O3/Bi2Se3nanoarchitectures and NiCoSe2/Ni0.85Se nanoparticles with appealing rate capability for the construction of high-energy and long-cycle-life asymmetric aqueous batteries
Source: Royal Society of Chemistry journal article supplement (doi:10.1039/c9ta05310g), 2019-01-01
Supplement: c9ta05310g1.pdf [file c9ta05310g1.pdf]

**One-Step Synthesis of Flower-Like Bi<sub>2</sub>O<sub>3</sub>/Bi<sub>2</sub>Se<sub>3</sub> Nanoarchitectures  
and NiCoSe<sub>2</sub>/Ni<sub>0.85</sub>Se Nanoparticles with Appealing Rate Capability  
for Constructing High-Energy and Long-Cycle-Life Asymmetric  
Aqueous Batteries**

**Alan Meng<sup>a</sup>, Xiangcheng Yuan<sup>a</sup>, Tong Shen<sup>a</sup>, Zhenjiang Li<sup>b#</sup>, Qingyan Jiang<sup>c</sup>,**

**Hongyao Xue<sup>b</sup>, Yusheng Lin<sup>d</sup>, Jian Zhao<sup>b\*</sup>**

<sup>a</sup>*State Key Laboratory Base of Eco-chemical Engineering, College of Chemistry and Molecular Engineering, Qingdao University of Science and Technology, Qingdao 266042, Shandong, P. R. China.*

<sup>b</sup>*Key Laboratory of Polymer Material Advanced Manufacturing Technology of Shandong Provincial, College of Electromechanical Engineering, College of Sino-German Science and Technology, Qingdao University of Science and Technology, Qingdao 266061, Shandong, P. R. China.*

<sup>c</sup>*Ocean College, Zhejiang University, Zhoushan 316021, Zhejiang, P. R. China.*

<sup>d</sup>*College of Materials Science and Engineering, Qingdao University of Science and Technology, Qingdao 266042, Shandong, P. R. China.*

<sup>#</sup>*These authors contributed equally to this work and should be considered co-first authors.*

**\*Corresponding Author**

*E-mail: [zhaojian19880105@163.com](mailto:zhaojian19880105@163.com)*

### Calculations:

(1) The specific capacity ( $Q$ ) and specific capacitance ( $C$ ) of the  $\text{Bi}_2\text{O}_3/\text{Bi}_2\text{Se}_3$  NFs or  $\text{NiCoSe}_2/\text{Ni}_{0.85}\text{Se}$  NPs on graphite substrate electrode calculated from GCD curves are obtained according to the following equation:

$$Q = \frac{I\Delta t}{\Delta V}; C = \frac{I\Delta t}{m\Delta V}$$

where  $I$  is the discharge current,  $\Delta t$  is the discharge time in GV test,  $m$  is the active material mass, and  $\Delta V$  is the voltage window.

(2) The specific capacitance of the  $\text{Bi}_2\text{O}_3/\text{Bi}_2\text{Se}_3$  NFs// $\text{NiCoSe}_2/\text{Ni}_{0.85}\text{Se}$  NPs asymmetric aqueous battery (AAB) device can be got in accordance with the following equation:

$$C_{\text{device}} = \frac{I\Delta t}{M\Delta V}$$

Herein,  $I$  is the discharge current,  $\Delta t$  is the discharge time in GCD test,  $M$  is the total mass of both positive and negative electrodes, and  $\Delta V$  is the voltage window of the device.

(3) Methods to calculate the energy and power density of the ASC device:

$$E = \frac{1}{2} C_{\text{device}} \Delta V^2; P = \frac{E}{t}$$

Here,  $C_{\text{device}}$  is the specific capacitance of the device,  $\Delta V$  is the potential window, and  $t$  is the discharge time.

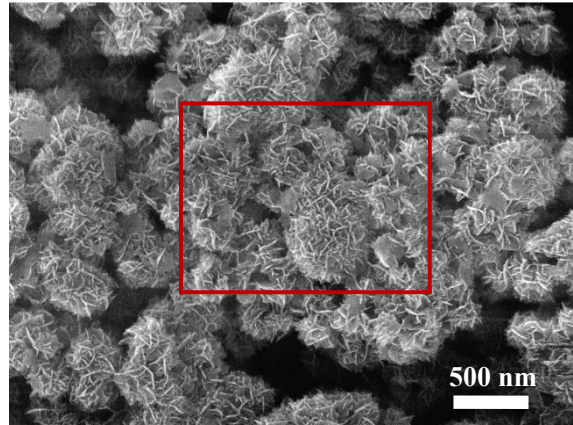

**Fig. S1.** SEM image of the obtained  $\text{Bi}_2\text{O}_3/\text{Bi}_2\text{Se}_3$  NFs.

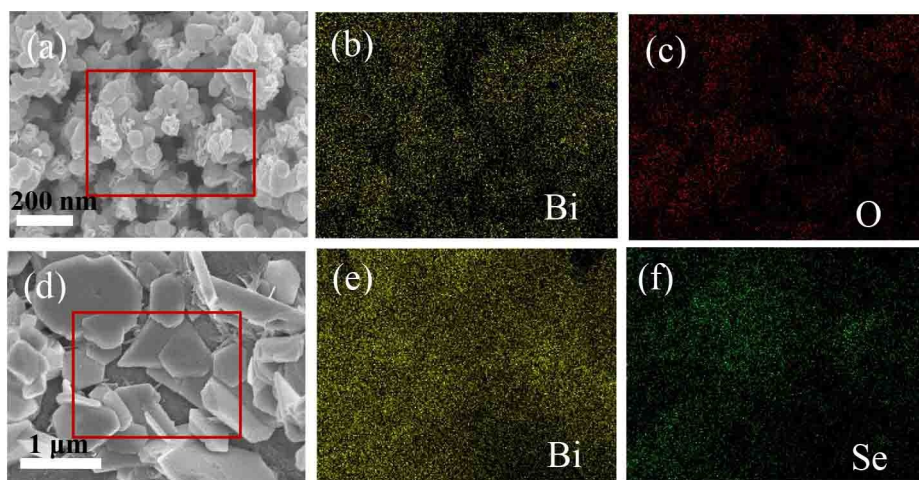

**Fig. S2.** The elemental mapping of the  $\text{Bi}_2\text{O}_3$  (a-c) and  $\text{Bi}_2\text{Se}_3$  sample (d-f).

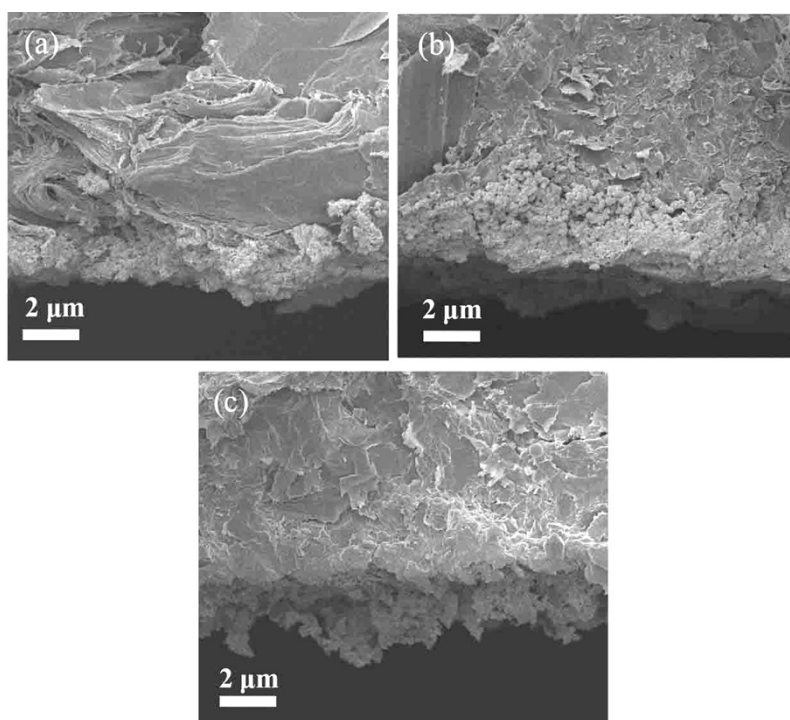

**Fig. S3.** Low-resolution cross-section SEM images of the  $\text{Bi}_2\text{O}_3$  (a),  $\text{Bi}_2\text{Se}_3$  (b) and  $\text{Bi}_2\text{O}_3/\text{Bi}_2\text{Se}_3$  (c).

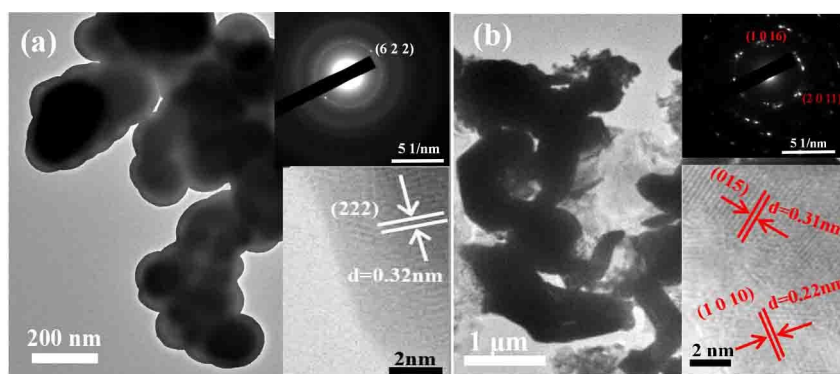

**Fig. S4.** The typical TEM images of the Bi<sub>2</sub>O<sub>3</sub> (a) and Bi<sub>2</sub>Se<sub>3</sub> (b) with the insets showing the corresponding SAED patterns and HRTEM images.

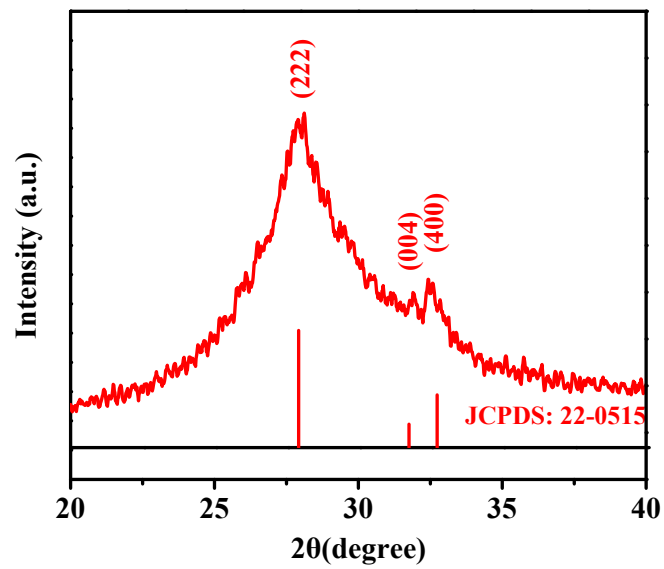

Fig. S5. Local-magnification XRD pattern of Bi<sub>2</sub>O<sub>3</sub> NSs.

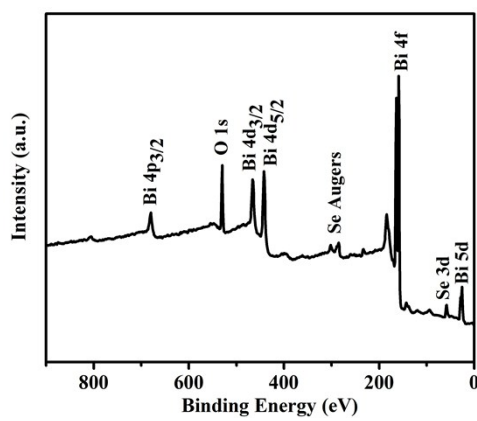

Fig. S6. XPS survey spectrum of Bi<sub>2</sub>O<sub>3</sub>/Bi<sub>2</sub>Se<sub>3</sub> NFs.

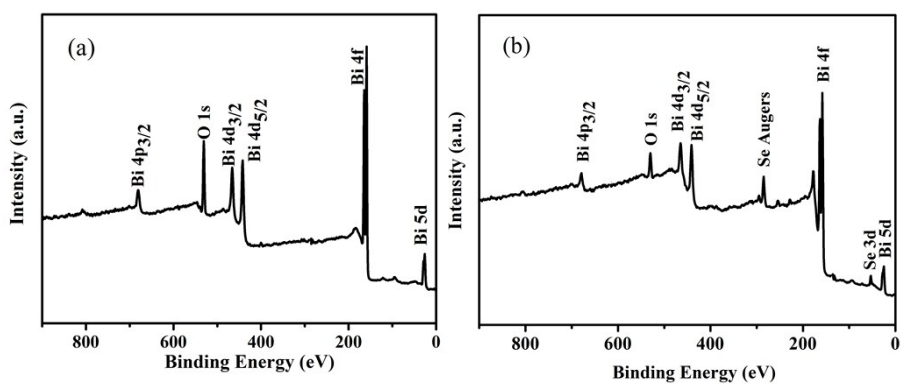

Fig. S7. XPS survey spectrum of the pristine  $\text{Bi}_2\text{O}_3$  (a) and  $\text{Bi}_2\text{Se}_3$  (b) products .

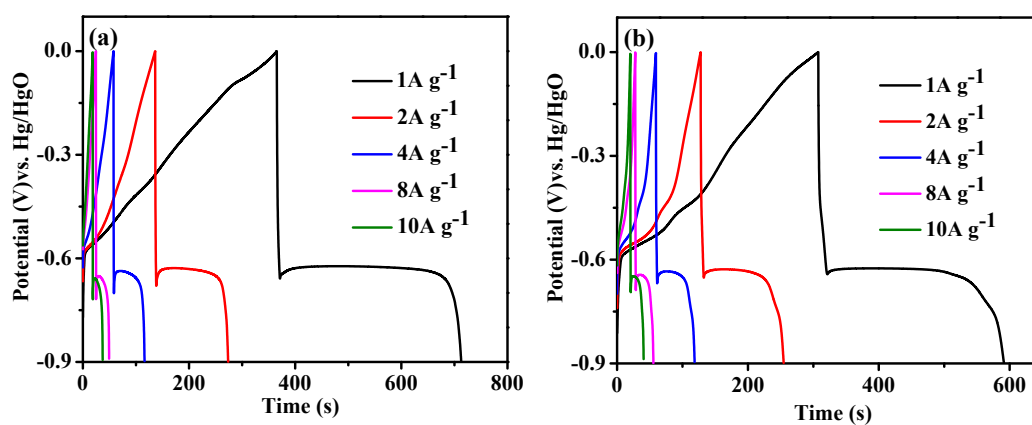

Fig. S8. GCD profiles at different current densities of the  $\text{Bi}_2\text{O}_3$  NSs (a) and  $\text{Bi}_2\text{Se}_3$  NSs (b) electrode

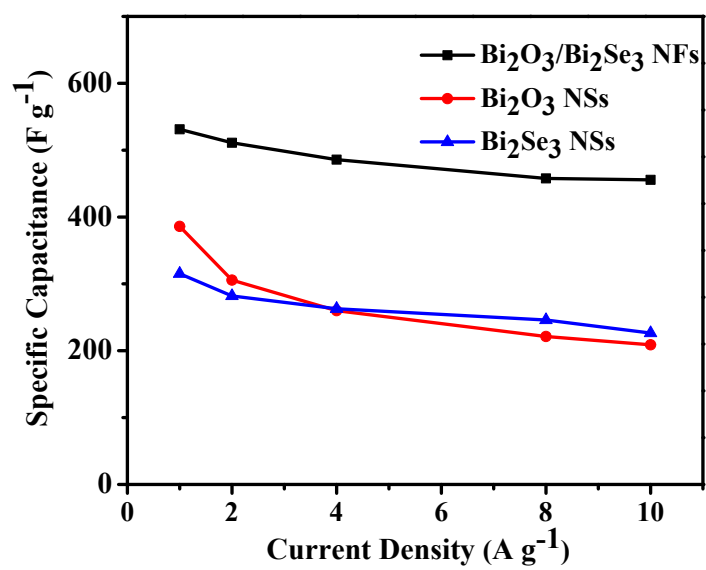

**Fig. S9.** specific capacitance values of the Bi<sub>2</sub>O<sub>3</sub> NSs, Bi<sub>2</sub>O<sub>3</sub>/Bi<sub>2</sub>Se<sub>3</sub> NFs and Bi<sub>2</sub>Se<sub>3</sub> NSs electrode versus different current densities



**Table S1.** Comparison of the electrochemical properties of the Bi<sub>2</sub>O<sub>3</sub>/Bi<sub>2</sub>Se<sub>3</sub> NFs with previously reported negative electrode materials.

| Material                                                        | Fabrication method                    | current collector         | Specific capacitance or capacity                                            | Rate performance                                                              | Reference           |
|-----------------------------------------------------------------|---------------------------------------|---------------------------|-----------------------------------------------------------------------------|-------------------------------------------------------------------------------|---------------------|
| Bi <sub>2</sub> O <sub>3</sub>                                  | Hydrothermal                          | Ni foam                   | 447 F g <sup>-1</sup> (2A g <sup>-1</sup> )                                 | 260 F g <sup>-1</sup> (10 A g <sup>-1</sup> )                                 | S1                  |
| FeOOH                                                           | Electrodeposition                     | Polyamide Nanofiber Film  | 315 F g <sup>-1</sup> (0.5 A g <sup>-1</sup> )                              | 194 F g <sup>-1</sup> (10 A g <sup>-1</sup> )                                 | S2                  |
| Bi <sub>2</sub> S <sub>3</sub>                                  | Hydrothermal and calcination          | S-NCNF                    | 466 F g <sup>-1</sup> (1 A g <sup>-1</sup> )                                | 299 F g <sup>-1</sup> (8 A g <sup>-1</sup> )                                  | S3                  |
| Bi <sub>2</sub> O <sub>3</sub>                                  | Room-temperature wet chemical method. | Ni foam                   | 155 mAh g <sup>-1</sup> (0.4 A g <sup>-1</sup> )                            | 58 mAh g <sup>-1</sup> (1.8 A g <sup>-1</sup> )                               | S4                  |
| Fe <sub>2</sub> O <sub>3</sub>                                  | Hydrothermal                          | Ni foam                   | 158.9 mAh g <sup>-1</sup> (1 A g <sup>-1</sup> )                            | 32.8 mAh g <sup>-1</sup> (10 A g <sup>-1</sup> )                              | S5                  |
| WO <sub>3</sub>                                                 | Calcination                           | GCE                       | 508 F g <sup>-1</sup> (1 A g <sup>-1</sup> )                                | 332.2 F g <sup>-1</sup> (20 A g <sup>-1</sup> )                               | S6                  |
| MoS <sub>2</sub>                                                | Hydrothermal                          | RCF                       | 225 F g <sup>-1</sup> (0.5A g <sup>-1</sup> )                               | 106 F g <sup>-1</sup> (5 A g <sup>-1</sup> )                                  | S7                  |
| ZnFe <sub>2</sub> O <sub>4</sub>                                | Calcination                           | Ni foam                   | 58.7 mAh g <sup>-1</sup> (1 A g <sup>-1</sup> )                             | 50.2 mAh g <sup>-1</sup> (1 A g <sup>-1</sup> )                               | S8                  |
| Fe <sub>3</sub> O <sub>4</sub>                                  | Hydrothermal and calcination          | Ni foam                   | 379.8 F g <sup>-1</sup> (2 A g <sup>-1</sup> )                              | 272.2 F g <sup>-1</sup> (10 A g <sup>-1</sup> )                               | S9                  |
| Fe <sub>2</sub> O <sub>3</sub>                                  | Hydrothermal                          | Ni foam                   | 269 mAh g <sup>-1</sup> (0.3A g <sup>-1</sup> )                             | 67.3 mAh g <sup>-1</sup> (12.3 A g <sup>-1</sup> )                            | S10                 |
| <b>Bi<sub>2</sub>O<sub>3</sub>/Bi<sub>2</sub>Se<sub>3</sub></b> | <b>Solvothermal</b>                   | <b>Graphite substrate</b> | <b>132.7 mAh g<sup>-1</sup> (531F g<sup>-1</sup>) at 1 A g<sup>-1</sup></b> | <b>113.8 mAh g<sup>-1</sup> (455 F g<sup>-1</sup>) at 10 A g<sup>-1</sup></b> | <b>In this work</b> |

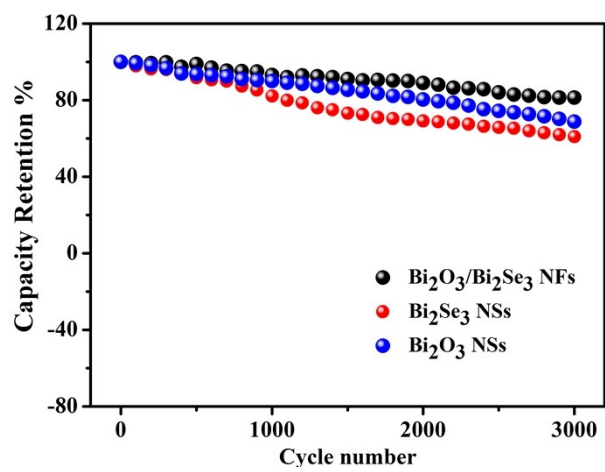

**Fig. S10.** Cyclic stability of the Bi<sub>2</sub>O<sub>3</sub>/Bi<sub>2</sub>Se<sub>3</sub> NFs Bi<sub>2</sub>O<sub>3</sub> NSs and Bi<sub>2</sub>Se<sub>3</sub> NSs negative electrode materials over 3000 cycles at 8 A g<sup>-1</sup>.

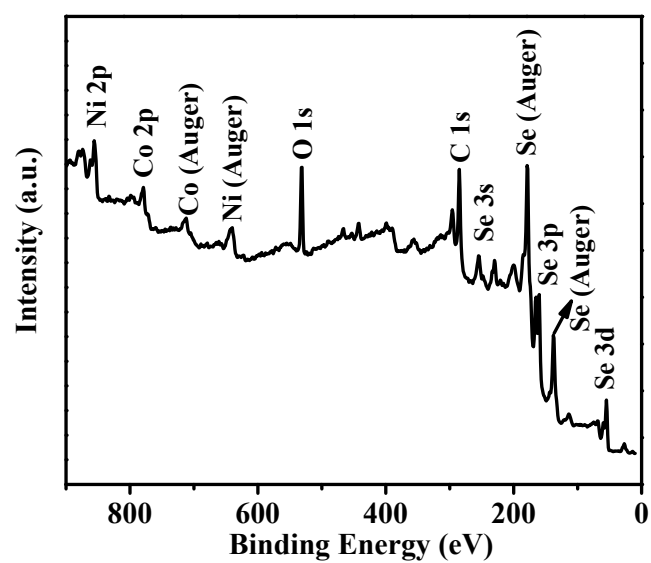

Fig. S11. XPS survey spectrum of the of the NiCoSe<sub>2</sub>/Ni<sub>0.85</sub>Se NPs.

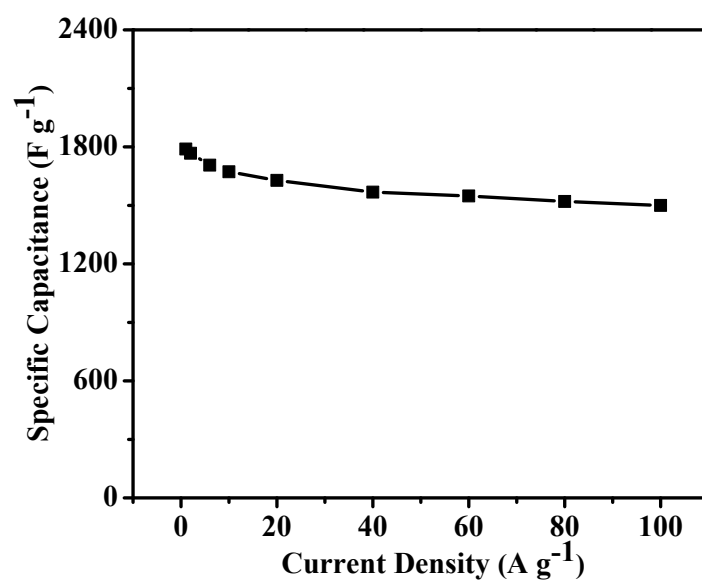

Fig. S12. Specific capacitance of the NiCoSe<sub>2</sub>/Ni<sub>0.85</sub>Se NPs as a function of current densities

**Table S2.** Electrochemical performances comparison of the CoNiSe<sub>2</sub>/Ni<sub>0.85</sub>Se NPs with other Ni-Co compound based positive electrodes fabricated by different methods.

| Material                                            | Fabrication method                | current collector         | Specific capacitance or capacity                                              | Rate performance                                                             | Reference           |
|-----------------------------------------------------|-----------------------------------|---------------------------|-------------------------------------------------------------------------------|------------------------------------------------------------------------------|---------------------|
| (Ni,Co)Se <sub>2</sub> /NiCo-LDH                    | Calcination and electrodeposition | Carbon substrate          | 170 mAh g <sup>-1</sup> (2 A g <sup>-1</sup> )                                | 120.7 mAh g <sup>-1</sup> (20 A g <sup>-1</sup> )                            | S11                 |
| CoNi-MOF                                            | Hydrothermal and calcination      | Ni foam                   | 1044 F g <sup>-1</sup> (2 A g <sup>-1</sup> )                                 | 569 F g <sup>-1</sup> (32A g <sup>-1</sup> )                                 | S12                 |
| CoNi <sub>2</sub> S <sub>4</sub>                    | Chemical deposition               | Ni foam                   | 1530 F g <sup>-1</sup> (1 A g <sup>-1</sup> )                                 | 1346 F g <sup>-1</sup> (8 A g <sup>-1</sup> )                                | S13                 |
| NiCo <sub>2</sub> O <sub>4</sub> /CNT               | Calcination                       | Ni foam                   | 1596 F g <sup>-1</sup> (1 A g <sup>-1</sup> )                                 | 1406 F g <sup>-1</sup> (10 A g <sup>-1</sup> )                               | S14                 |
| Ni <sub>3</sub> S <sub>2</sub>                      | Hydrothermal                      | Ni foam                   | 70 mAh g <sup>-1</sup> (2mA cm <sup>-2</sup> )                                | -----                                                                        | S15                 |
| CoNiSe <sub>2</sub>                                 | Solvothermal and calcination      | Ni foam                   | 750 F g <sup>-1</sup> (1 A g <sup>-1</sup> )                                  | 660 F g <sup>-1</sup> (20 A g <sup>-1</sup> )                                | S16                 |
| NiSe <sub>2</sub>                                   | Plasma-exfoliation                | Ni foam                   | 466 F g <sup>-1</sup> (3 A g <sup>-1</sup> )                                  | 328 F g <sup>-1</sup> (20 A g <sup>-1</sup> )                                | S17                 |
| NiCo <sub>2</sub> O <sub>4</sub>                    | Hydrothermal and calcination      | Carbon cloth              | 1055 F g <sup>-1</sup> (0.4 A g <sup>-1</sup> )                               | 483 F g <sup>-1</sup> (10 A g <sup>-1</sup> )                                | S18                 |
| Co <sub>3</sub> O <sub>4</sub> /Ni-based MOFs       | Hydrothermal                      | Carbon cloth              | 209 mAh g <sup>-1</sup> (2 A g <sup>-1</sup> )                                | ~58 mAh g <sup>-1</sup> (10 A g <sup>-1</sup> )                              | S19                 |
| Co <sub>3</sub> O <sub>4</sub> /Co(OH) <sub>2</sub> | Hydrothermal                      | polyethylene naphthalate  | 184.9 mAh g <sup>-1</sup> (1 A g <sup>-1</sup> )                              | 129.4 mAh g <sup>-1</sup> (16 A g <sup>-1</sup> )                            | S20                 |
| <b>NiCoSe<sub>2</sub>/Ni<sub>0.85</sub>Se</b>       | <b>Electrodeposition</b>          | <b>Graphite substrate</b> | <b>248.4 mAh g<sup>-1</sup> (1788 F g<sup>-1</sup>) at 1 A g<sup>-1</sup></b> | <b>208 mAh g<sup>-1</sup> (1500 F g<sup>-1</sup>) at 100A g<sup>-1</sup></b> | <b>In this work</b> |

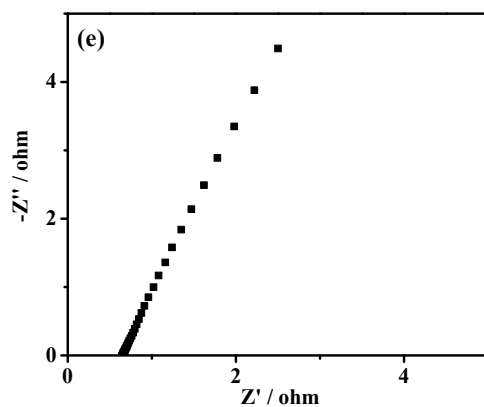

**Fig. S13.** Nyquist plot of the NiCoSe<sub>2</sub>/Ni<sub>0.85</sub>Se NPs hybrid electrode.

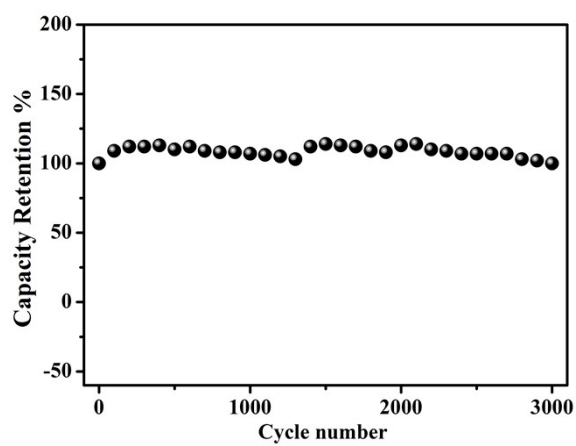

**Fig. S14.** Cyclic stability of the NiCoSe<sub>2</sub>/Ni<sub>0.85</sub>Se NPs hybrid positive electrode materials over 3000 cycles at 10 A g<sup>-1</sup>.

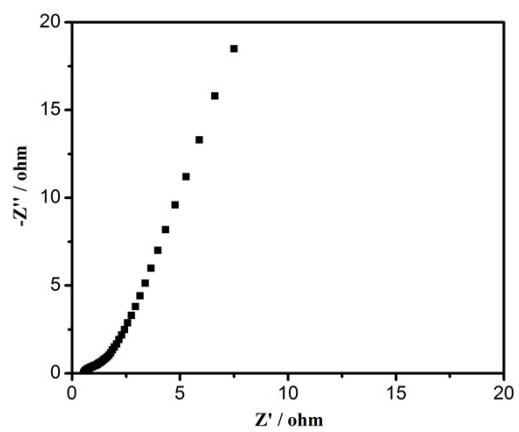

**Fig. S15.** The Nyquist plot of the device.

**Table. S3** Cycle performance comparison of the assembled AAB with other state-of-the-art devices with various positive and negative electrodes.

| ASC devices                                                                                             | Cell voltage<br>(V) | Cycle performance                             | Reference           |
|---------------------------------------------------------------------------------------------------------|---------------------|-----------------------------------------------|---------------------|
| Fe <sub>2</sub> O <sub>3</sub> -P//MnO <sub>2</sub>                                                     | 1.6                 | 88% retention after 9000<br>cycles            | S21                 |
| MnO <sub>2</sub> //Fe <sub>2</sub> O <sub>3</sub>                                                       | 2.2                 | 83% retention after 3000<br>cycles            | S22                 |
| Co <sub>3</sub> O <sub>4</sub> // $\gamma$ -Fe <sub>2</sub> O <sub>3</sub>                              | 1.7                 | 80.1% retention after 5000<br>cycles          | S23                 |
| Ni-Co-S-W/NF//AC/NF                                                                                     | 1.8                 | 91.7% retention after 6000<br>cycles          | S24                 |
| MnO <sub>2</sub> /CNT//CNT/PPy                                                                          | 1.5                 | 80% retention after 5000<br>cycles            | S25                 |
| Ni-Co-N/GP//GOP                                                                                         | 1.5                 | 95% retention after 5000<br>cycles            | S26                 |
| NF@NiO//FeOOH HSCs                                                                                      | 1.7                 | 84.7% retention after 10000<br>cycles         | S27                 |
| ZnNiCo-P//PPD-rGOs                                                                                      | 1.6                 | 89% retention after 8000<br>cycles            | S28                 |
| NiO–CuO//PGH                                                                                            | 1.6                 | 90.4% retention after 5000<br>cycles          | S29                 |
| CC/H-Ni@Al-Co-S//graphene/CNT                                                                           | 1.8                 | 90.6% retention after 10000<br>cycles         | S30                 |
| <b>Bi<sub>2</sub>O<sub>3</sub>/Bi<sub>2</sub>Se<sub>3</sub>//NiCoSe<sub>2</sub>/Ni<sub>0.85</sub>Se</b> | <b>1.6</b>          | <b>91.5% retention after<br/>10000 cycles</b> | <b>In this work</b> |

## References

- S1 N. Shinde, Q. Xia, J. Yun, R. Mane and K. Kim, *Acs Appl. Mater. Interfaces*, 2018, **10**, 11037.
- S2 T. Gao, Z. Zhou, J. Yu, D. Cao, G. Wang, B. Ding and Y. Li, *ACS appl. mater. Interfaces*, 2018, **10**, 23834.
- S3 W. Zong, F. Lai, G. He, J. Feng, W. Wang, R. Lian, Y. Miao, G. Wang, I. Parkin and T. Liu, *Small*, 2018, **14**, 1801562.
- S4 N. Shinde, Q. Xia, J. Yun, P. Shinde, S. Shaikh, R. Sahoo, S. Mathur, R. Mane and K. Kim, *Electrochim. Acta*, 2019, **296**, 308.
- S5 X. Yun, J. Li, Z. Luo, J. Tang and Y. Zhu, *Electrochim. Acta*, 2019, **302**, 449.
- S6 D. Mandal, P. Routh and A. K. Nandi, *Small*, 2018, **14**, 1702881.
- S7 C. Zhao, Y. Zhou, Z. Ge, C. Zhao and X. Qian, *Carbon*, 2018, **127**, 699.
- S8 Yang, Z. Han, F. Zheng, J. Sun, Z. Qiao, X. Yang, L. Li, C. Li, X. Song and B. Cao, *Carbon*, 2018, **134**, 15.
- S9 F. Li, H. Chen, X. Liu, S. Zhu, J. Jia, C. Xu, F. Dong, Z. Wen and Y. Zhang, *J. Mater. Chem. A*, 2016, **4**, 2096.
- S10 J. Zhu, L. Li, Z. Xiong, Y. Hu and J. Jiang, *ACS Sustainable Chem. Eng.*, 2017, **5**, 269.
- S11 X. Li, H. Wu, C. Guan, A. Elshahawy, Y. Dong, S. Pennycook and J. Wang, *Small*, 2019, **15**, 1803895.
- S12 T. Deng, Y. Lu, W. Zhang, M. Sui, X. Shi, D. Wang and W. Zheng, *Adv. Energy Mater.*, 2018, **8**, 1702294.
- S13 X. Cao, J. He, H. Li, L. Kang, X. He, J. Sun, R. Jiang, H. Xu, Z. Lei and Z. Liu, *Small*, 2018, **14**, 1800998.



- S14 P. Wu, S. Cheng, M. Yao, L. Yang, Y. Zhu, P. Liu, O. Xing, J. Zhou, M. Wang and H. Luo, *Adv. Funct. Mater.*, 2017, **27**, 1702160.
- S15 K. Tao, Y. Gong, Q. Zhou and J. Lin, *Electrochim. Acta*, 2018, **286**, 65.
- S16 L. Hou, Y. Shi, C. Wu, Y. Zhang, Y. Ma, X. Sun, J. Sun, X. Zhang and C. Yuan, *Adv. Funct. Mater.*, 2018, **28**, 1705921.
- S17 A. Chang, C. Zhang, Y. Yu, Y. Yu and B. Zhang, *ACS appl. mater. Interfaces*, 2018, **10**, 41861.
- S18 C. Guan, X. Liu, W. Ren, X. Li, C. Cheng and J. Wang, *Adv. Energy Mater.*, 2017, **7**, 1602391.
- S19 L. Zhang, Y. Zhang, S. Huang, Y. Yuan, H. Li, Z. Jin, J. Wu, Q. Liao, L. Hu, J. Lu, S. Ruan and Y. Zeng, *Electrochim. Acta*, 2018, **281**, 189.
- S20 G. Lee and J. Jang, *J. Power Sources*, 2019, **423**, 115.
- S21 H. Liang, C. Xia, A. Emwas, D. Anjum, X. Miao and H. Alshareef, *Nano energy*, 2018, **49**, 155.
- S22 M. Zhang, Y. Li and Z. Shen, *J. Power Sources*, 2019, **414**, 479.
- S23 R. Wang, Y. Sui, S. Huang, Y. Pu and P. Cao, *Chem. Eng. J.*, 2018, **331**, 527.
- S24 W. He, Z. Liang, K. Ji, Q. Sun, T. Zhai and X. Xu, *Nano Res.*, 2018, **11**, 1415.
- S25 J. Yu, W. Lu, J. Smith, K. Booksh, L. Meng, Y. Huang, Q. Li, J. Byun, Y. Oh and Y. Yan, *Adv. Energy Mater.*, 2017, **7**, 1600976.
- S26 F. Liu, L. Zeng, Y. Chen, R. Zhang, R. Yang, J. Pang, L. Ding, H. Liu and W. Zhou, *Nano Energy*, 2019, **61**, 18.
- S27 Q. Chen, J. Li, C. Liao, G. Hu, Y. Fu, O. K. Asare, S. Shi, Z. Liu, L. Zhou and L.

Mai, *J. Mater. Chem. A*, 2018, **6**, 19488.

S28 J. Li, Z. Liu, Q. Zhang, Y. Cheng, B. Zhao, S. Dai, H.-H. Wu, K. Zhang, D. Ding and Y. Wu, *Nano Energy*, 2019, **57**, 22.

S29 Z. Fang, S. ur Rehman, M. Sun, Y. Yuan, S. Jin and H. Bi, *J. Mater. Chem. A*, 2018, **6**, 21131.

S30 J. Huang, J. Wei, Y. Xiao, Y. Xu, Y. Xiao, Y. Wang, L. Tan, K. Yuan and Y. Chen, *ACS nano*, 2018, **12**, 3030.
